# Supplementary material for: Construction and Activity Testing of a Modular Fusion Peptide against Enterococcus faecalis
Source: MDPI journal article supplement (doi:10.3390/antibiotics12020388), 2023-02-14
Supplement: s1 [file s1]

**Figure S1: Calculated  $p$ -values for text Figures 4 and 5**

Buffer-treated control *E. faecalis* ATCC 29212

#### Analysis of Variance Results

F-statistic value = 1.93294

P-value = 0.16219

| Time (min) | Data Summary |         |      |           |            |
|------------|--------------|---------|------|-----------|------------|
|            | Groups       | N       | Mean | Std. Dev. | Std. Error |
|            | 0            | Group 1 | 3    | 100       | 0          |
|            | 15           | Group 2 | 3    | 91.7376   | 7.0592     |
|            | 30           | Group 3 | 3    | 88.2754   | 5.1134     |
|            | 45           | Group 4 | 3    | 87.446    | 6.566      |
|            | 60           | Group 5 | 3    | 87.5339   | 9.2092     |
|            | 120          | Group 6 | 3    | 85.9954   | 6.8225     |

| ANOVA Summary  |                    |                |             |        |         |
|----------------|--------------------|----------------|-------------|--------|---------|
| Source         | Degrees of Freedom | Sum of Squares | Mean Square | F-Stat | P-Value |
|                | DF                 | SS             | MS          |        |         |
| Between Groups | 5                  | 403.4163       | 80.6833     | 1.9329 | 0.1622  |
| Within Groups  | 12                 | 500.8948       | 41.7412     |        |         |
| Total:         | 17                 | 904.3111       |             |        |         |

## BP404/150 ng + *E. faecalis* ATCC 29212

### Analysis of Variance Results

F-statistic value = 21.47908

P-value = 0.00001

|     | Data Summary |   |         |           |            |
|-----|--------------|---|---------|-----------|------------|
|     | Groups       | N | Mean    | Std. Dev. | Std. Error |
| 0   | Group 1      | 3 | 100     | 0         | 0          |
| 15  | Group 2      | 3 | 92.5531 | 4.5019    | 2.5991     |
| 30  | Group 3      | 3 | 85.2549 | 4.0799    | 2.3555     |
| 45  | Group 4      | 3 | 80.2306 | 4.4532    | 2.5711     |
| 60  | Group 5      | 3 | 74.4624 | 4.3486    | 2.5107     |
| 120 | Group 6      | 3 | 69.3766 | 5.7551    | 3.3227     |

| ANOVA Summary  |                    |                |             |         |         |
|----------------|--------------------|----------------|-------------|---------|---------|
| Source         | Degrees of Freedom | Sum of Squares | Mean Square | F-Stat  | P-Value |
|                | DF                 | SS             | MS          |         |         |
| Between Groups | 5                  | 1946.9926      | 389.3985    | 21.4791 | 0       |
| Within Groups  | 12                 | 217.5504       | 18.1292     |         |         |
| Total:         | 17                 | 2164.543       |             |         |         |

BP404/600 ng + *E. faecalis* ATCC 29212

### Analysis of Variance Results

F-statistic value = 70.06407

P-value = 0

| Time (min) | Data Summary |         |         |           |            |        |
|------------|--------------|---------|---------|-----------|------------|--------|
|            | Groups       | N       | Mean    | Std. Dev. | Std. Error |        |
|            | 0            | Group 1 | 3       | 100       | 0          | 0      |
|            | 15           | Group 2 | 3       | 82.2077   | 2.2513     | 1.2998 |
|            | 30           | Group 3 | 3       | 74.3752   | 3.3666     | 1.9437 |
|            | 45           | Group 4 | 3       | 70.105    | 3.6677     | 2.1175 |
|            | 60           | Group 5 | 3       | 66.0796   | 2.7927     | 1.6124 |
| 120        | Group 6      | 3       | 63.6175 | 2.9626    | 1.7105     |        |

| ANOVA Summary  |                    |                |             |         |         |
|----------------|--------------------|----------------|-------------|---------|---------|
| Source         | Degrees of Freedom | Sum of Squares | Mean Square | F-Stat  | P-Value |
|                | DF                 | SS             | MS          |         |         |
| Between Groups | 5                  | 2710.9274      | 542.1855    | 70.0641 | 0       |
| Within Groups  | 12                 | 92.8611        | 7.7384      |         |         |
| Total:         | 17                 | 2803.7885      |             |         |         |

BP404/5400 ng + *E. faecalis* ATCC 29212

Analysis of Variance Results

F-statistic value = 315.20925

P-value = 0

| Time (min) | Data Summary |         |         |           |            |        |
|------------|--------------|---------|---------|-----------|------------|--------|
|            | Groups       | N       | Mean    | Std. Dev. | Std. Error |        |
|            | 0            | Group 1 | 3       | 100       | 0          | 0      |
|            | 15           | Group 2 | 3       | 90.9645   | 2.5508     | 1.4727 |
|            | 30           | Group 3 | 3       | 80.3174   | 3.3285     | 1.9217 |
|            | 45           | Group 4 | 3       | 71.579    | 2.2369     | 1.2915 |
|            | 60           | Group 5 | 3       | 67.1205   | 1.4951     | 0.8632 |
| 120        | Group 6      | 3       | 39.3696 | 0.9426    | 0.5442     |        |

| ANOVA Summary  |                    |                |             |          |         |
|----------------|--------------------|----------------|-------------|----------|---------|
| Source         | Degrees of Freedom | Sum of Squares | Mean Square | F-Stat   | P-Value |
|                | DF                 | SS             | MS          |          |         |
| Between Groups | 5                  | 6754.1549      | 1350.831    | 315.2092 | 0       |
| Within Groups  | 12                 | 51.4261        | 4.2855      |          |         |
| Total:         | 17                 | 6805.581       |             |          |         |

BP404/15000 ng + *E. faecalis* ATCC 29212

### Analysis of Variance Results

F-statistic value = 106.46001

P-value = 0

| Time (min) | Data Summary |         |      |           |            |        |
|------------|--------------|---------|------|-----------|------------|--------|
|            | Groups       | N       | Mean | Std. Dev. | Std. Error |        |
|            | 0            | Group 1 | 3    | 100       | 0          | 0      |
|            | 15           | Group 2 | 3    | 80.7189   | 3.897      | 2.25   |
|            | 30           | Group 3 | 3    | 70.98     | 4.792      | 2.7667 |
|            | 45           | Group 4 | 3    | 64.2004   | 4.0891     | 2.3608 |
|            | 60           | Group 5 | 3    | 50.6748   | 4.5494     | 2.6266 |
|            | 120          | Group 6 | 3    | 39.3257   | 1.802      | 1.0404 |

| ANOVA Summary  |                    |                |             |        |         |
|----------------|--------------------|----------------|-------------|--------|---------|
| Source         | Degrees of Freedom | Sum of Squares | Mean Square | F-Stat | P-Value |
|                | DF                 | SS             | MS          |        |         |
| Between Groups | 5                  | 6992.192       | 1398.4384   | 106.46 | 0       |
| Within Groups  | 12                 | 157.6297       | 13.1358     |        |         |
| Total:         | 17                 | 7149.8217      |             |        |         |

Buffer-treated control *E. faecalis* clinical strain

Analysis of Variance Results

F-statistic value = 0.55765

P-value = 0.73056

| Time (min) | Data Summary |         |      |           |            |        |
|------------|--------------|---------|------|-----------|------------|--------|
|            | Groups       | N       | Mean | Std. Dev. | Std. Error |        |
|            | 0            | Group 1 | 3    | 100       | 0          | 0      |
|            | 15           | Group 2 | 3    | 91.4761   | 8.6021     | 4.9664 |
|            | 30           | Group 3 | 3    | 97.5701   | 14.1413    | 8.1645 |
|            | 45           | Group 4 | 3    | 89.5609   | 3.4852     | 2.0122 |
|            | 60           | Group 5 | 3    | 95.9443   | 7.4142     | 4.2806 |
|            | 120          | Group 6 | 3    | 99.2237   | 15.4817    | 8.9383 |

| ANOVA Summary  |                    |                |             |        |         |
|----------------|--------------------|----------------|-------------|--------|---------|
| Source         | Degrees of Freedom | Sum of Squares | Mean Square | F-Stat | P-Value |
|                | DF                 | SS             | MS          |        |         |
| Between Groups | 5                  | 269.8896       | 53.9779     | 0.5576 | 0.7306  |
| Within Groups  | 12                 | 1161.545       | 96.7954     |        |         |
| Total:         | 17                 | 1431.4346      |             |        |         |

BP404/150 ng + *E. faecalis* clinical strain

Analysis of Variance Results

F-statistic value = 493.56562

P-value = 0

| Time (min) | Data Summary |         |      |           |            |
|------------|--------------|---------|------|-----------|------------|
|            | Groups       | N       | Mean | Std. Dev. | Std. Error |
|            | 0            | Group 1 | 3    | 100       | 0          |
|            | 15           | Group 2 | 3    | 88.4184   | 0.7278     |
|            | 30           | Group 3 | 3    | 71.3492   | 2.0561     |
|            | 45           | Group 4 | 3    | 54.3454   | 0.9997     |
|            | 60           | Group 5 | 3    | 45.5076   | 3.9297     |
|            | 120          | Group 6 | 3    | 38.2311   | 0.8837     |

| ANOVA Summary  |                    |                |             |          |         |
|----------------|--------------------|----------------|-------------|----------|---------|
| Source         | Degrees of Freedom | Sum of Squares | Mean Square | F-Stat   | P-Value |
|                | DF                 | SS             | MS          |          |         |
| Between Groups | 5                  | 9040.5213      | 1808.1043   | 493.5656 | 0       |
| Within Groups  | 12                 | 43.9602        | 3.6634      |          |         |
| Total:         | 17                 | 9084.4815      |             |          |         |

BP404/600 ng + *E. faecalis* clinical strain

Analysis of Variance Results

F-statistic value = 131.76728

P-value = 0

| Time (min) | Data Summary |   |         |           |            |
|------------|--------------|---|---------|-----------|------------|
|            | Groups       | N | Mean    | Std. Dev. | Std. Error |
|            | Group 1      | 3 | 100     | 0         | 0          |
|            | Group 2      | 3 | 89.3856 | 5.5946    | 3.2301     |
|            | Group 3      | 3 | 76.7851 | 4.1918    | 2.4201     |
|            | Group 4      | 3 | 61.9264 | 3.9308    | 2.2695     |
|            | Group 5      | 3 | 47.637  | 2.8466    | 1.6435     |
|            | Group 6      | 3 | 40.686  | 1.5974    | 0.9222     |

| ANOVA Summary  |                    |                |             |          |         |
|----------------|--------------------|----------------|-------------|----------|---------|
| Source         | Degrees of Freedom | Sum of Squares | Mean Square | F-Stat   | P-Value |
|                | DF                 | SS             | MS          |          |         |
| Between Groups | 5                  | 8232.9015      | 1646.5803   | 131.7673 | 0       |
| Within Groups  | 12                 | 149.9535       | 12.4961     |          |         |
| Total:         | 17                 | 8382.855       |             |          |         |



BP404/5400 ng + *E. faecalis* clinical strain

Analysis of Variance Results

F-statistic value = 323.73242

P-value = 0

| Time (min) | Data Summary |         |        |           |            |        |
|------------|--------------|---------|--------|-----------|------------|--------|
|            | Groups       | N       | Mean   | Std. Dev. | Std. Error |        |
|            | 0            | Group 1 | 3      | 100       | 0          | 0      |
|            | 15           | Group 2 | 3      | 93.3465   | 0.8546     | 0.4934 |
|            | 30           | Group 3 | 3      | 78.1829   | 2.5638     | 1.4802 |
|            | 45           | Group 4 | 3      | 64.52     | 3.3284     | 1.9216 |
|            | 60           | Group 5 | 3      | 45.8622   | 4.5681     | 2.6374 |
| 120        | Group 6      | 3       | 31.075 | 1.0657    | 0.6153     |        |

| ANOVA Summary  |                    |                |             |          |         |
|----------------|--------------------|----------------|-------------|----------|---------|
| Source         | Degrees of Freedom | Sum of Squares | Mean Square | F-Stat   | P-Value |
|                | DF                 | SS             | MS          |          |         |
| Between Groups | 5                  | 10894.9211     | 2178.9842   | 323.7324 | 0       |
| Within Groups  | 12                 | 80.7698        | 6.7308      |          |         |
| Total:         | 17                 | 10975.6909     |             |          |         |

BP404/15000 ng + *E. faecalis* clinical strain

### Analysis of Variance Results

F-statistic value = 391.42536

P-value = 0

| Time (min) | Data Summary |         |         |           |            |        |
|------------|--------------|---------|---------|-----------|------------|--------|
|            | Groups       | N       | Mean    | Std. Dev. | Std. Error |        |
|            | 0            | Group 1 | 3       | 100       | 0          | 0      |
|            | 15           | Group 2 | 3       | 93.8344   | 3.7144     | 2.1445 |
|            | 30           | Group 3 | 3       | 77.5195   | 3.9508     | 2.281  |
|            | 45           | Group 4 | 3       | 54.7234   | 2.5946     | 1.498  |
|            | 60           | Group 5 | 3       | 32.3017   | 3.3614     | 1.9407 |
| 120        | Group 6      | 3       | 13.7329 | 2.7213    | 1.5712     |        |

| ANOVA Summary  |                    |                |             |          |         |
|----------------|--------------------|----------------|-------------|----------|---------|
| Source         | Degrees of Freedom | Sum of Squares | Mean Square | F-Stat   | P-Value |
|                | DF                 | SS             | MS          |          |         |
| Between Groups | 5                  | 17888.7981     | 3577.7596   | 391.4254 | 0       |
| Within Groups  | 12                 | 109.684        | 9.1403      |          |         |
| Total:         | 17                 | 17998.4821     |             |          |         |
